# Supplementary material
Source: PubMed Central journal article supplement (PMC5006391)
Supplement: NIHMS797299-supplement-Supp_Table_S2.pdf [file NIHMS797299-supplement-Supp_Table_S2.pdf]

**Table S2.** Limbs injected at stage 15 with shPANX-A virus were normal in size at stage 37.

| <b>Average Area (mm<sup>2</sup>)</b> | <b>shPANX3-A control</b> | <b>shPANX3-A treated</b> |
|--------------------------------------|--------------------------|--------------------------|
| Radius                               | 2.94±0.48                | 2.68±0.47                |
| Ulna                                 | 4.11±0.56                | 3.88±0.56                |
| Humerus                              | 5.57±1.06                | 5.43±0.84                |
| <b>Average Area (mm<sup>2</sup>)</b> | <b>shEGFP control</b>    | <b>shEGFP treated</b>    |
| Radius                               | 2.68±0.47                | 2.88±0.27                |
| Ulna                                 | 3.88±0.56                | 4.08±0.46                |
| Humerus                              | 5.43±0.84                | 5.97±0.65                |
